# Supplementary material for: Neoantigens retention in patient derived xenograft models mediates autologous T cells activation in ovarian cancer
Source: PubMed Central journal article supplement — Oncoimmunology. 2019 Mar 30;8(6):e1586042. doi: 10.1080/2162402X.2019.1586042 (PMC6492964; doi:10.1080/2162402x.2019.1586042), 2019-03-30

# Supplementary Figures

**Neoantigens retention in patient derived xenograft models mediates autologous T cells activation in ovarian cancer**

*Muzamil Yaqub Want<sup>1</sup>, Anna Konstorum<sup>2</sup>, Rueda-Yea Huang<sup>1</sup>, Vaibhav Jain<sup>1</sup>, Satoko Matsueda<sup>1</sup>, Takemasa Tsuji<sup>1</sup>, Kunle Odunsi<sup>1</sup>, Richard Koya<sup>1</sup> and Sebastiano Battaglia<sup>1,3</sup>*

**Figure S1**

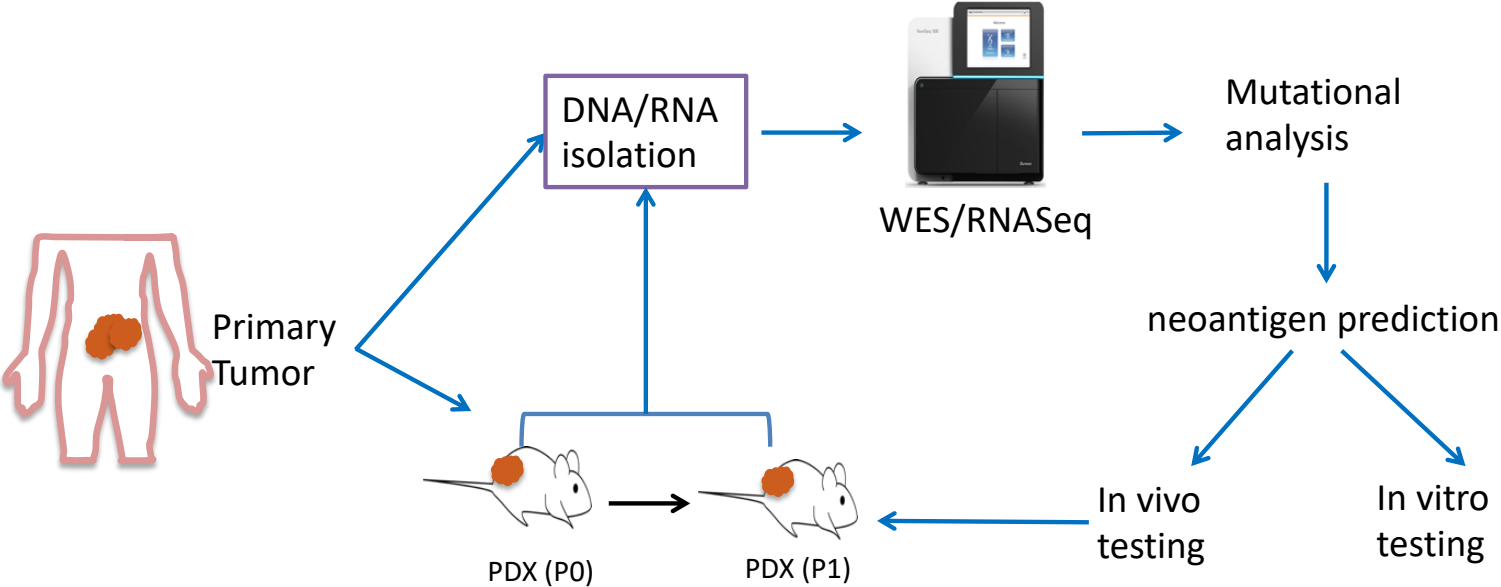

**Supplementary Figure 1.** Schematic overview of the experimental design

**Table S1**

| <b>Cluster 1</b> ANOVA + Tukey post hoc |            |            |            |             |  |
|-----------------------------------------|------------|------------|------------|-------------|--|
| diff                                    | lwr        | upr        | p          | adj         |  |
| P0-Primary                              | 24.595     | 12.790258  | 36.39974   | 7.62E-06    |  |
| P1-Primary                              | 30.56      | 18.755258  | 42.36474   | 3.40E-08    |  |
| P1-P0                                   | 5.965      | -5.839742  | 17.76974   | 4.56E-01    |  |
| <b>Cluster 2</b> ANOVA + Tukey post hoc |            |            |            |             |  |
| diff                                    | lwr        | upr        | p          | adj         |  |
| P0-Primary                              | 7.818841   | -1.880991  | 17.518673  | 0.1403854   |  |
| P1-Primary                              | 5.291304   | -4.408528  | 14.991136  | 0.4036103   |  |
| P1-P0                                   | -2.527536  | -12.227368 | 7.172296   | 0.8119756   |  |
| <b>Cluster 3</b> ANOVA + Tukey post hoc |            |            |            |             |  |
| diff                                    | lwr        | upr        | p          | adj         |  |
| P0-Primary                              | -19.15     | -30.910591 | -7.3894089 | 0.000864491 |  |
| P1-Primary                              | -11.864286 | -23.624877 | -0.1036946 | 0.04762308  |  |
| P1-P0                                   | 7.285714   | -4.474877  | 19.0463054 | 0.297695708 |  |

**Supplementary Table1.** Results from ANOVA analysis with post-hoc Tukey correction comparing the Variant Allele Frequency in clusters 1, 2 and 3

**Table S2**

| Gene name | Chromosome no | POS       | REF | ALT | Peptide mut | Peptide Wt | MUT affinity | WT affinity | HLA type  | Immunogenic | Delta     | ID |
|-----------|---------------|-----------|-----|-----|-------------|------------|--------------|-------------|-----------|-------------|-----------|----|
| SSC4D     | 7             | 76397626  | C   | A   | YGTGHILLY   | YGTGHILLD  | 130.24       | 23661.68    | HLA-B3501 | Yes         | -23531.44 | 1  |
| SSC4D     | 7             | 76397626  | C   | A   | YGTGHILLY   | YGTGHILLD  | 213.34       | 17009.42    | HLA-C1203 | Yes         | -16796.08 | 2  |
| LAMB3     | 1             | 209638534 | C   | A   | YVNPVSLQL   | DVNPVSLQL  | 89.97        | 10572.19    | HLA-C1203 | No          | -10482.22 | 3  |
| CLEC10A   | 17            | 7076078   | C   | A   | HCPHCPVCFV  | HCPHCPVCFV | 197.04       | 10400.19    | HLA-B3501 | No          | -10203.15 | 4  |
| CDK8      | 13            | 26393423  | C   | T   | LLTSEPIFY   | LLTSEPIFH  | 348.61       | 9773.93     | HLA-B3501 | No          | -9425.32  | 5  |
| PRR14L    | 22            | 31676998  | G   | A   | LPSTDSETG   | PPSTDSETG  | 202.34       | 6536.96     | HLA-B3501 | No          | -6334.62  | 6  |
| GALNT7    | 4             | 173297796 | A   | G   | DATTCTVPL   | DTTCTVPL   | 277.68       | 5537.42     | HLA-B3501 | No          | -5259.74  | 7  |
| NAV1      | 1             | 201793862 | C   | T   | MAKAKAVAL   | TAKAKAVAL  | 311.38       | 4722.34     | HLA-B3501 | Yes         | -4410.96  | 8  |
| TRO       | X             | 54930991  | C   | G   | SVGACGFSY   | SLGACGFSY  | 352.16       | 3145.21     | HLA-B3501 | Yes         | -2793.05  | 9  |
| INO80     | 15            | 40983060  | T   | C   | EVPAAGRGH   | EMPAAGRGH  | 195.5        | 2104.14     | HLA-A2603 | No          | -1908.64  | 10 |
| CSF2RB    | 22            | 36937526  | C   | T   | LPEKQASSF   | PPEKQASSF  | 27.58        | 1900.41     | HLA-B3501 | No          | -1872.83  | 11 |
| CNDP1     | 18            | 74576989  | G   | C   | EEYPNSSRV   | EEYRNSRV   | 283.6        | 1998.84     | HLA-C1203 | No          | -1715.24  | 12 |
| OR5H14    | 3             | 98149939  | T   | A   | DIIPLKISY   | DIIPLLKISY | 132.89       | 1525.63     | HLA-A2501 | No          | -1392.74  | 13 |
| FHL1      | X             | 136209293 | C   | T   | VSKARKSPV   | VSKARKPPV  | 259.11       | 1389.97     | HLA-C1203 | No          | -1130.86  | 14 |
| CLEC10A   | 17            | 7076078   | C   | A   | VCFPVHSEM   | VCVPVHSEM  | 97.6         | 1155.46     | HLA-C1203 | Yes         | -1057.86  | 15 |
| CSMD2     | 1             | 33542740  | C   | G   | ASYRSSVSF   | GSYRSSVSF  | 354.08       | 1369.23     | HLA-C1203 | Not tested  | -1015.15  | 16 |
| CLEC10A   | 17            | 7076078   | C   | A   | FPVHSEMML   | VPVHSEMML  | 41.22        | 991.08      | HLA-B3501 | Yes         | -949.86   | 17 |
| VSIG4     | X             | 66028109  | G   | A   | VVKDFSKLL   | VVKDSSKLL  | 235.21       | 1154.89     | HLA-C1203 | No          | -919.68   | 18 |
| STYK1     | 12            | 10621948  | G   | A   | YPEVLPPTSI  | YPEVPPTSI  | 462.21       | 1345.14     | HLA-B3501 | No          | -882.93   | 19 |
| DDX60L    | 4             | 168416796 | A   | C   | YVIFDEGHY   | YVIFDEVHY  | 93.25        | 732.52      | HLA-A2501 | Yes         | -639.27   | 20 |
| USH2A     | 1             | 215743308 | T   | A   | LIPEIPVYV   | LIPEIPVEY  | 273.7        | 861.68      | HLA-C1203 | No          | -587.98   | 21 |
| HNRNPUL1  | 19            | 41264762  | G   | C   | HPEPGGYSG   | HAEPGGYSG  | 139.29       | 693.43      | HLA-B3501 | No          | -554.14   | 22 |
| DDX60L    | 4             | 168416796 | A   | C   | YVIFDEGHY   | YVIFDEVHY  | 159.96       | 708.09      | HLA-A2603 | Yes         | -548.13   | 23 |
| OR51B4    | 11            | 5301398   | T   | A   | NLACADITF   | KLACADITF  | 97.15        | 597.07      | HLA-B3501 | Yes         | -499.92   | 24 |
| PATZ1     | 22            | 31328842  | C   | T   | RGFSSASTL   | RGFSSASAL  | 366.19       | 826.03      | HLA-C1203 | No          | -459.84   | 25 |
| BCAN      | 1             | 156658616 | C   | A   | ETVLYRYCR   | DTVLYRYCR  | 434.01       | 892.24      | HLA-A2603 | No          | -458.23   | 26 |
| PTBP3     | 9             | 112275909 | T   | C   | EIISGLLVF   | EIISGLLIF  | 296.98       | 567         | HLA-B3501 | No          | -270.02   | 27 |
| KPNA1     | 3             | 122457766 | T   | C   | QMEKGSQAY   | QMEKGNQAY  | 87.81        | 212.09      | HLA-B3501 | No          | -124.28   | 28 |

**Supplementary Table 2.** List of the mutations, neoantigens, affinity to the HLA, HLA type, difference MUT-WT and IDs

Figure S2

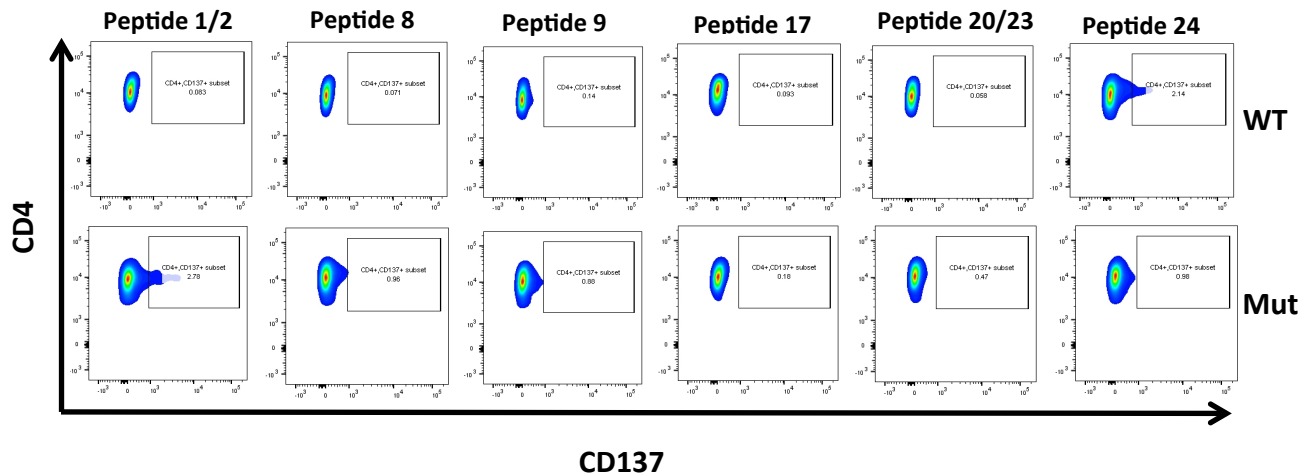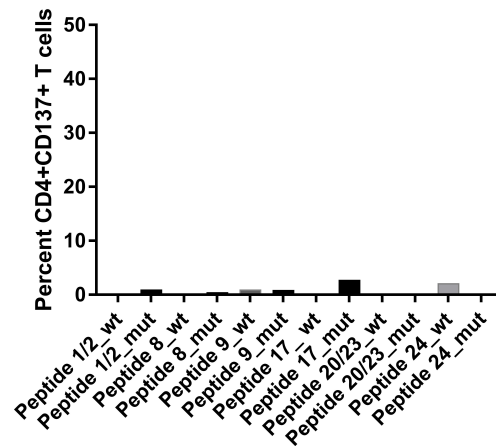

**Supplementary Figure 2.** Flow cytometry analysis of CD137 on CD4<sup>+</sup> T cells after stimulation with potential neoantigens or their wild type peptides. **C)** Percentage of activated CD4 T cells after 12 hour incubation with 10  $\mu$ m neoantigens or their wild type peptides

## Figure S3

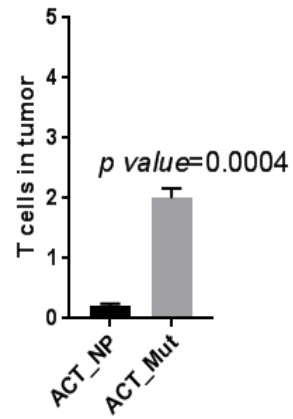

**Supplementary Figure 3.** Analysis of tumor resident T cells by flow cytometry in the PDX model of ovarian cancer infused with T cells stimulated with no peptide (ACT\_NP) or with a cocktail of six neoantigens (ACT\_Mut). Data shown as percentage of CD3<sup>+</sup> T cell at end point.

**Figure S4**

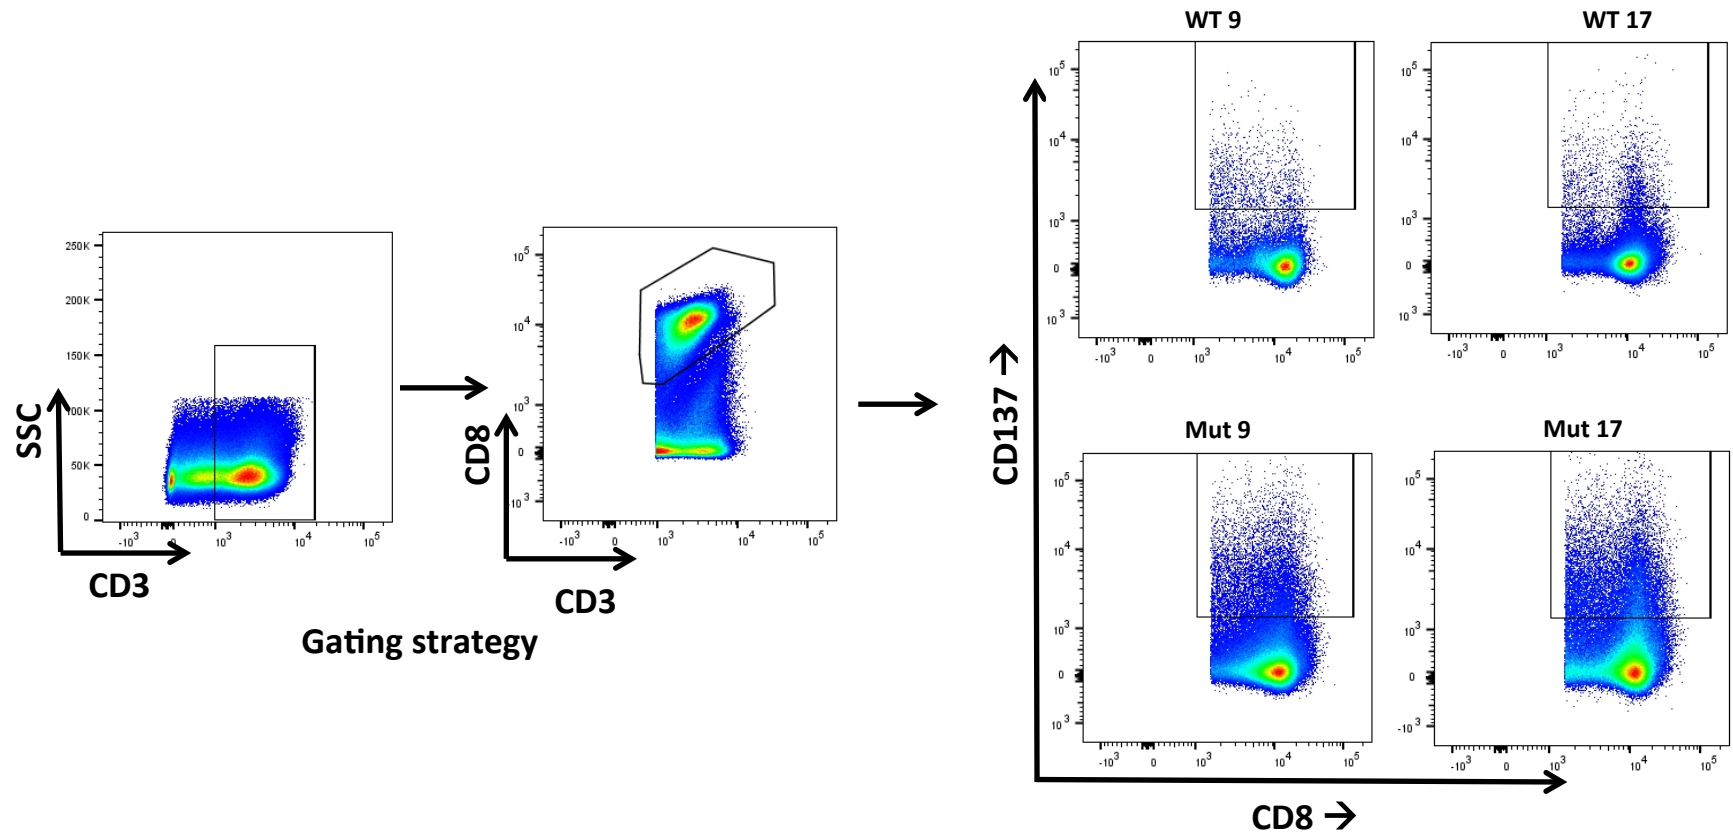

**Supplementary Figure 4.** Selection of CD8<sup>+</sup>/CD137<sup>+</sup> T cells for TCR sequencing. T cells were co-cultured with autologous APCs pulsed with peptide 9, 17 or the WT counterparts. Post stimulation (see methods), T cells were sorted and CD8<sup>+</sup>/CD137<sup>+</sup> T cells stimulated with MUT peptides used for deep sequencing.

**Figure S5**

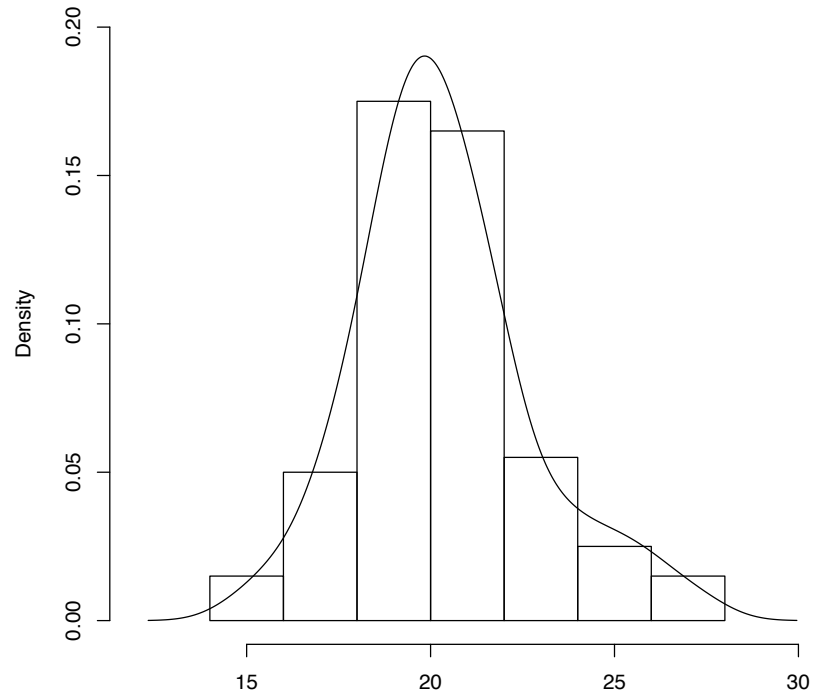

**Supplementary Figure 5.** Kernel distribution of 100 simulated GLAM score for random sequences



Figure S6

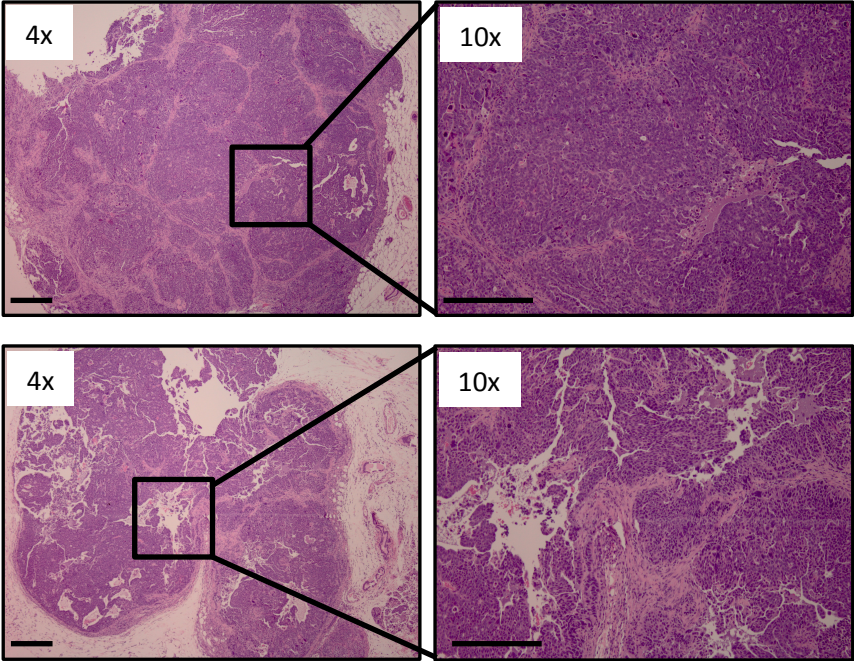

Supplement: koni-08-06-1586042-s001.pdf [file koni-08-06-1586042-s001.pdf]
